# Supplementary material for: Dysregulation of septin cytoskeletal organization in the trabecular meshwork contributes to ocular hypertension
Source: JCI journal article supplement (doi:10.1172/jci.insight.179468), 2024-12-05

**Immunoblots used for the manuscript figures**

Figure. 1A

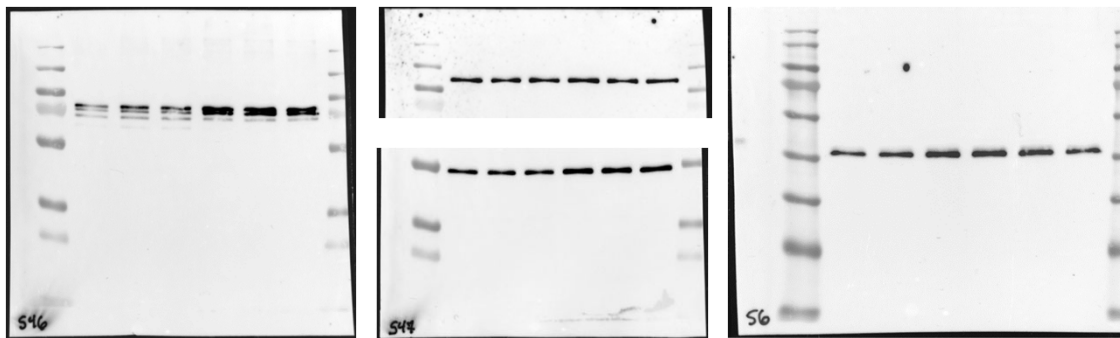

Figure. 1C

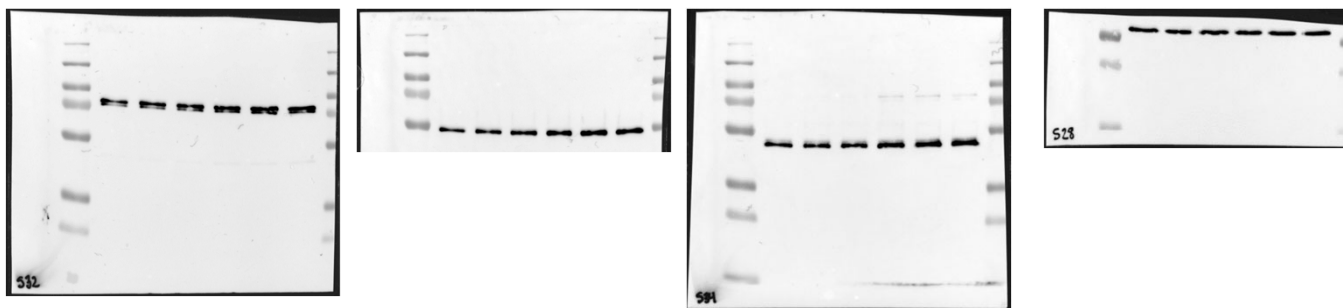

Figure. 1E

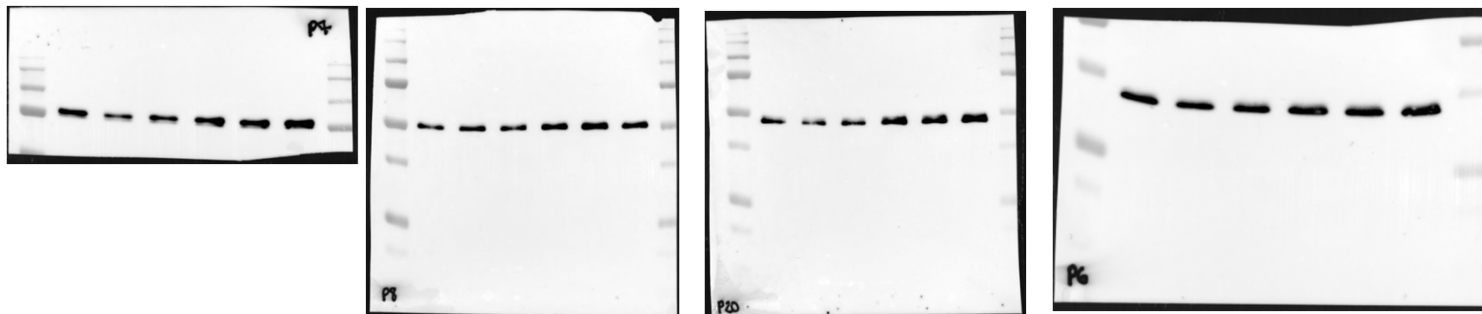

Figure.3D

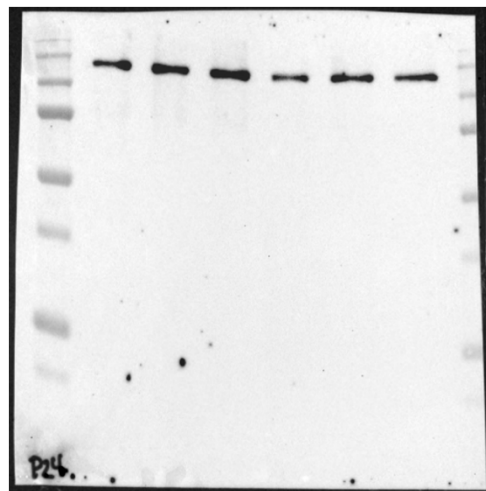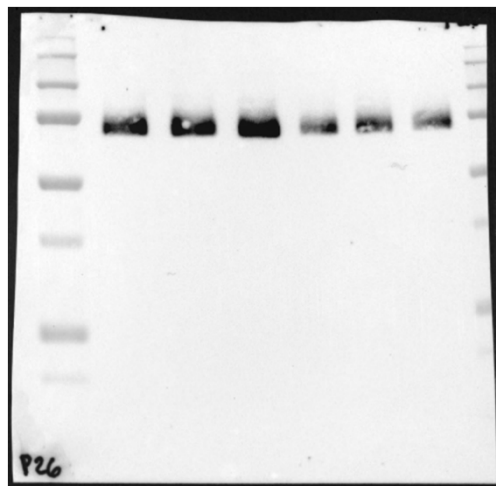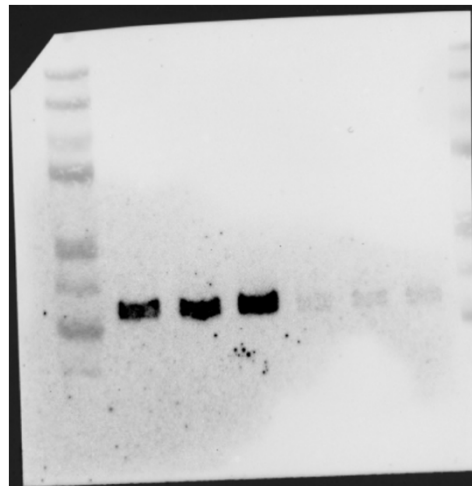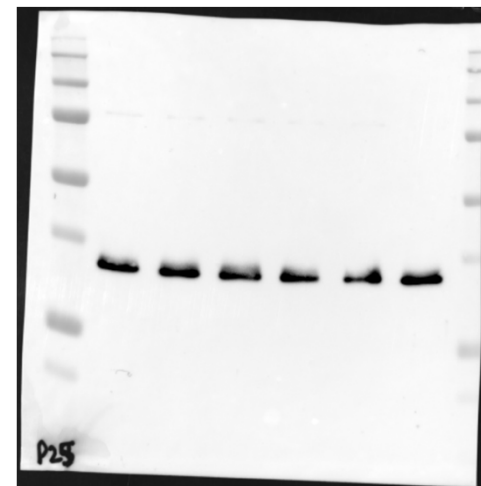

Figure. 4B

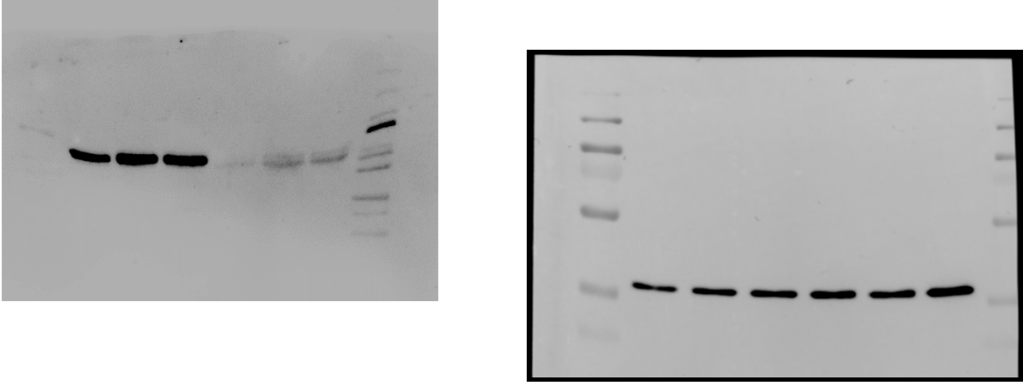

Figure. 4F

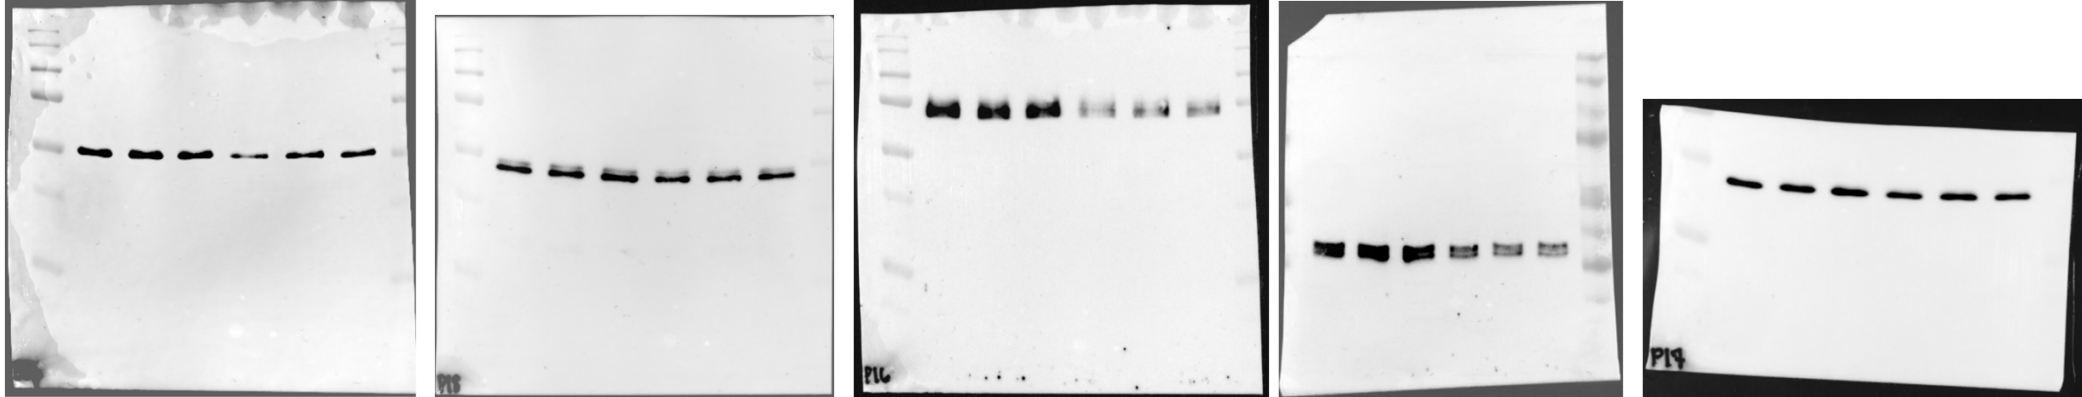

■ **Figure. 5C**

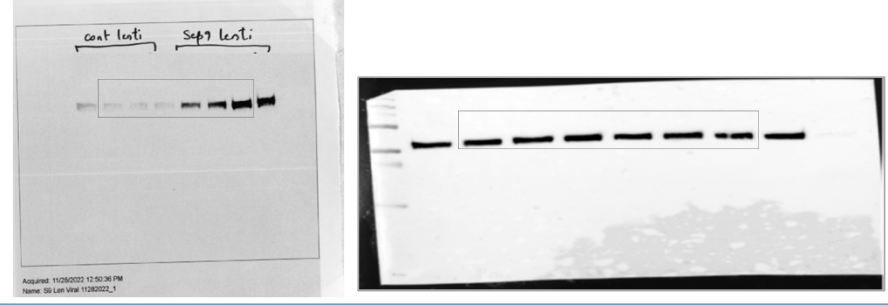

**Figure. 5G**

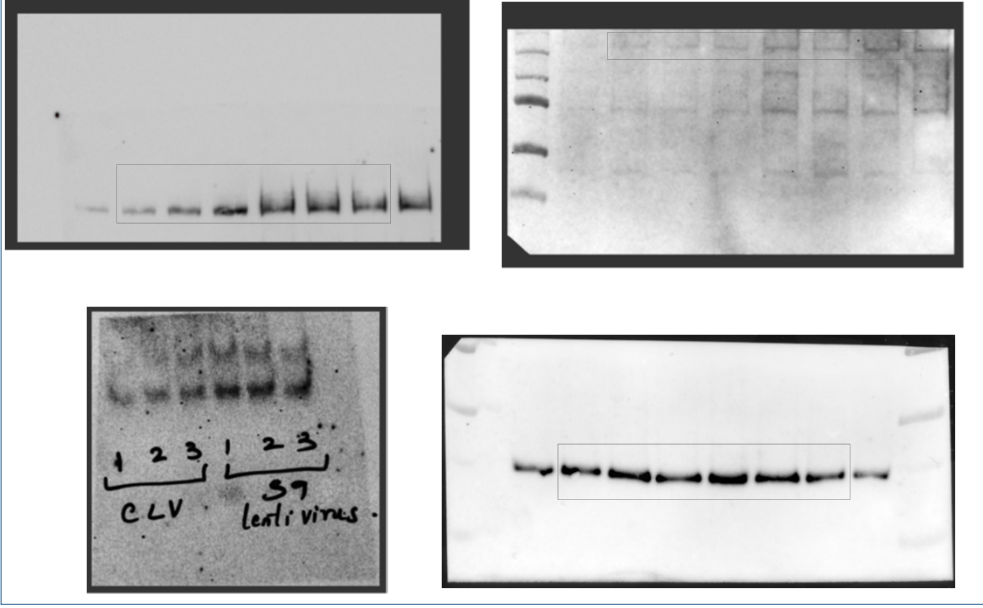

**Figure. 5D**

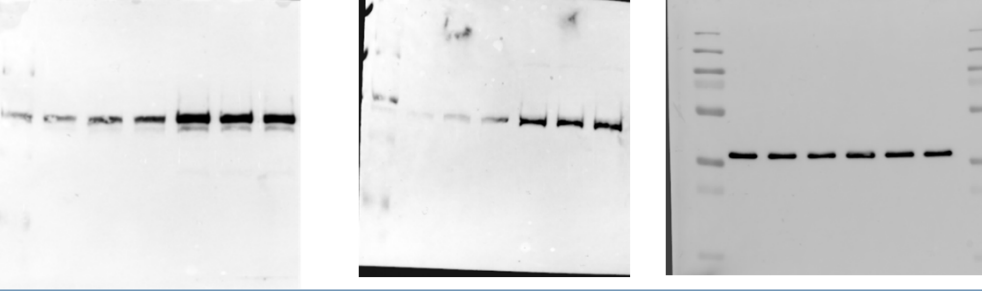

**Figure. 5I**

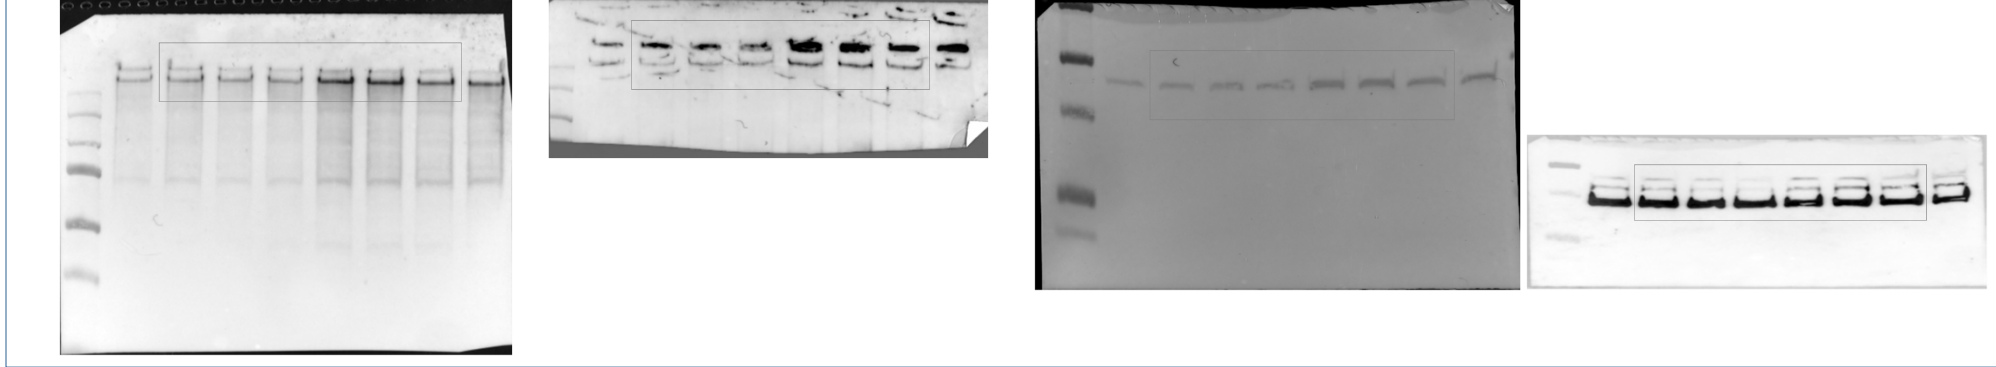

**Supplemental Figure 1**

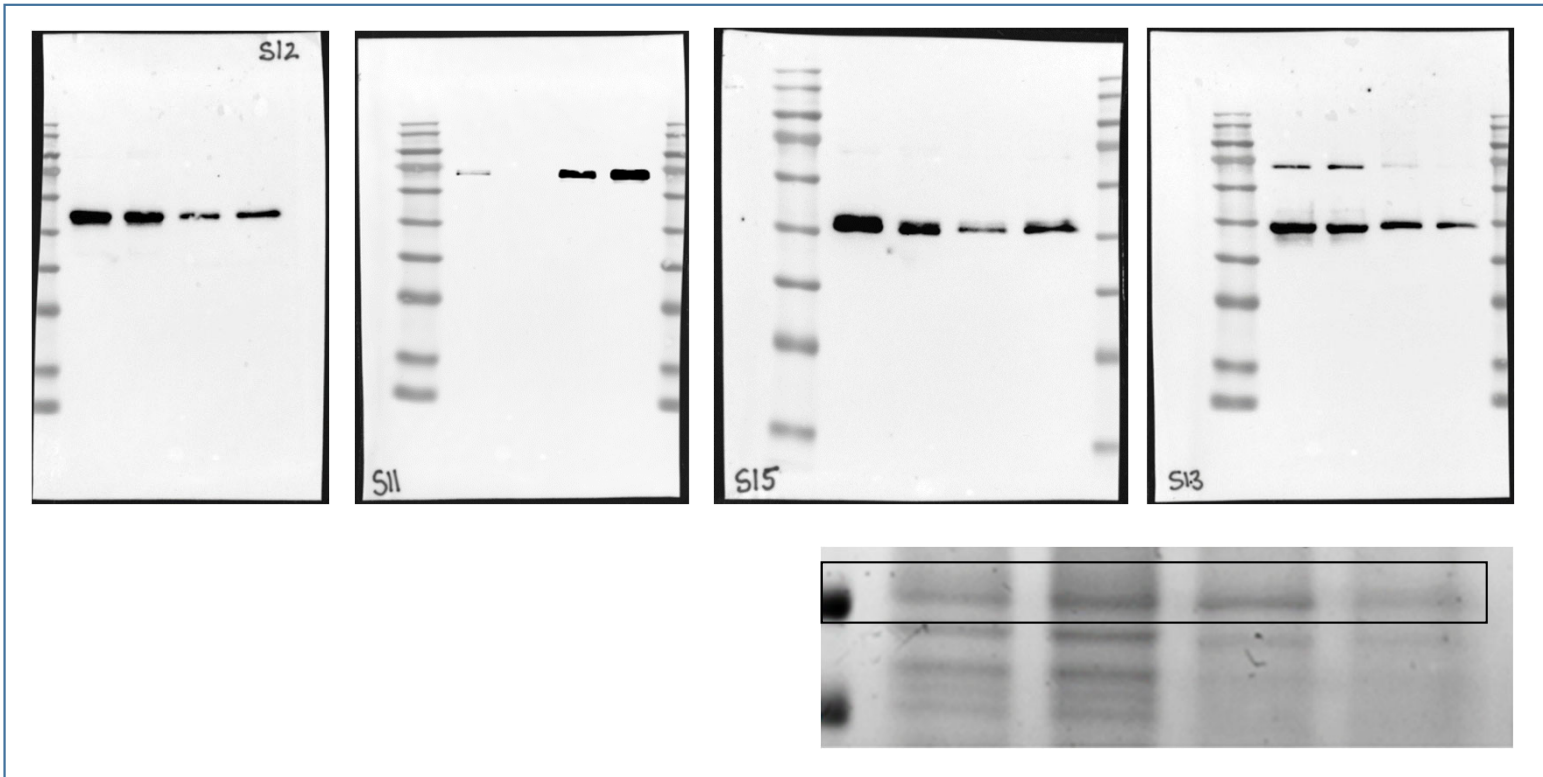

Supplement: sd2 [file 2]
